# Supplementary material for: Label free localization of nanoparticles in live cancer cells using spectroscopic microscopy
Source: Royal Society of Chemistry journal article supplement (doi:10.1039/c8nr07481j), 2018-01-01
Supplement: c8nr07481j1.pdf [file c8nr07481j1.pdf]

# Label free localization of nanoparticles in live cancer cells using spectroscopic microscopy

*Graham L C Spicer\*<sup>1</sup>, Sebastian A Thompson\*<sup>2\*</sup>, Luay Almassalha<sup>3</sup>, Ronald Ellis<sup>1</sup>, John E Chandler<sup>3</sup>, Scott J Gladstein<sup>3</sup>, Di Zhang<sup>3</sup>, The-Quyen Nguyen<sup>3</sup>, Seth Feder<sup>3</sup>, Hariharan Subramanian<sup>3</sup>, Roberto de la Rica<sup>4</sup> and Vadim Backman<sup>3\*</sup>.*

<sup>1</sup>Department of Chemical and Biological Engineering, Northwestern University, Evanston, IL 60208

<sup>2</sup>Department of Chemistry, Hunter College, New York, NY 10065

<sup>3</sup>Department of Biomedical Engineering, Northwestern University, Evanston, IL 60208

<sup>4</sup>Department of Pure and Applied Chemistry, University of Strathclyde, Technology and Innovation Centre, 99 George Street, Glasgow G1 1RD, Scotland

\*These authors contributed equally to this work

Corresponding authors:

Prof. Vadim Backman [v-backman@northwestern.edu](mailto:v-backman@northwestern.edu)

Dr. Sebastian Thompson [sthomps@hunter.cuny.edu](mailto:sthomps@hunter.cuny.edu)

KEYWORDS: Gold Nanoparticles, Live cell imaging, Intra- Extra-cellular, Hyperspectral microscopy.

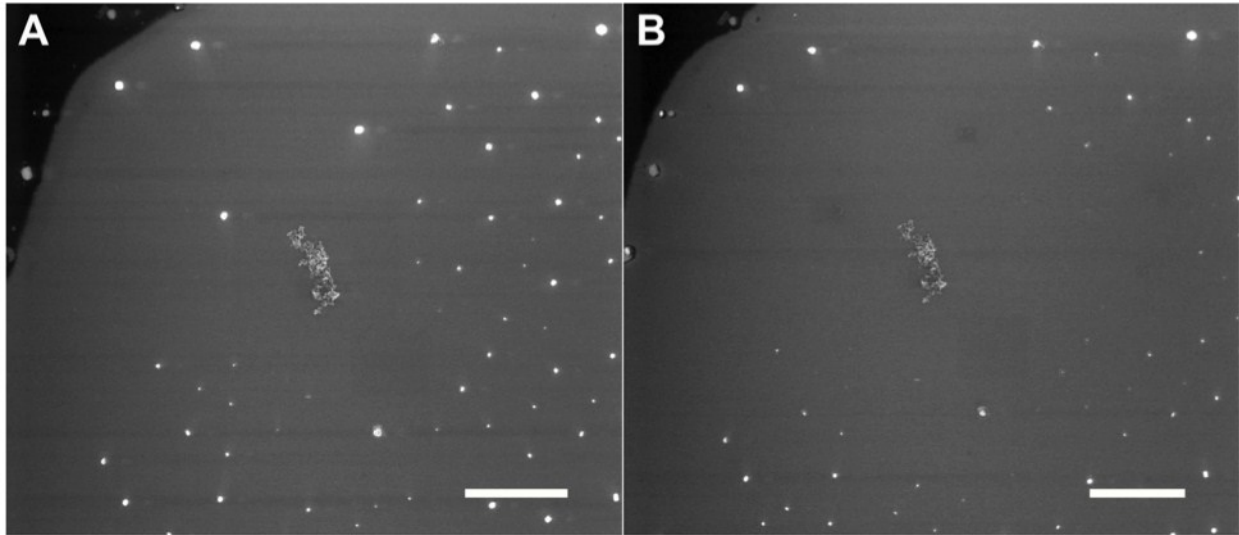

Supplementary figure 1. ESEM images of GNP cluster surrounded by salt crystals (a) before and (b) after electron beam bombardment confirms distinct composition of bright structures in the image. Salt crystals bombarded by the electron beam quickly disappear whereas GNPs remain on the glass slide.

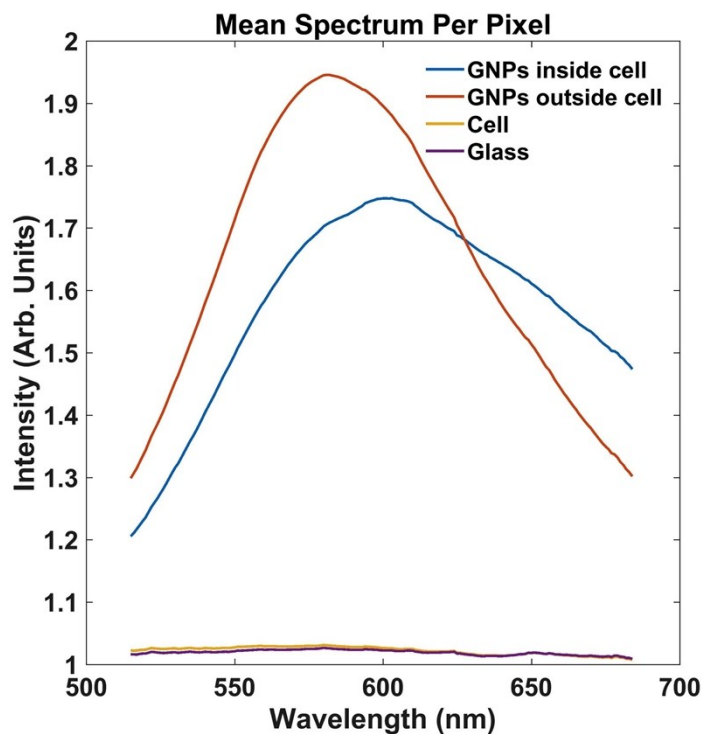

Supplementary figure 2. Averaged scattering spectra from GNPs inside and outside live HeLa cells, along with mean spectra from GNP-free regions of cell and glass slide. We observe a distinct shift in the spectral scattering peak when comparing internalized GNPs to those remaining outside of cells. This distinct shift is present due the interaction between GNR and cytoplasmic protein and GNR aggregation.

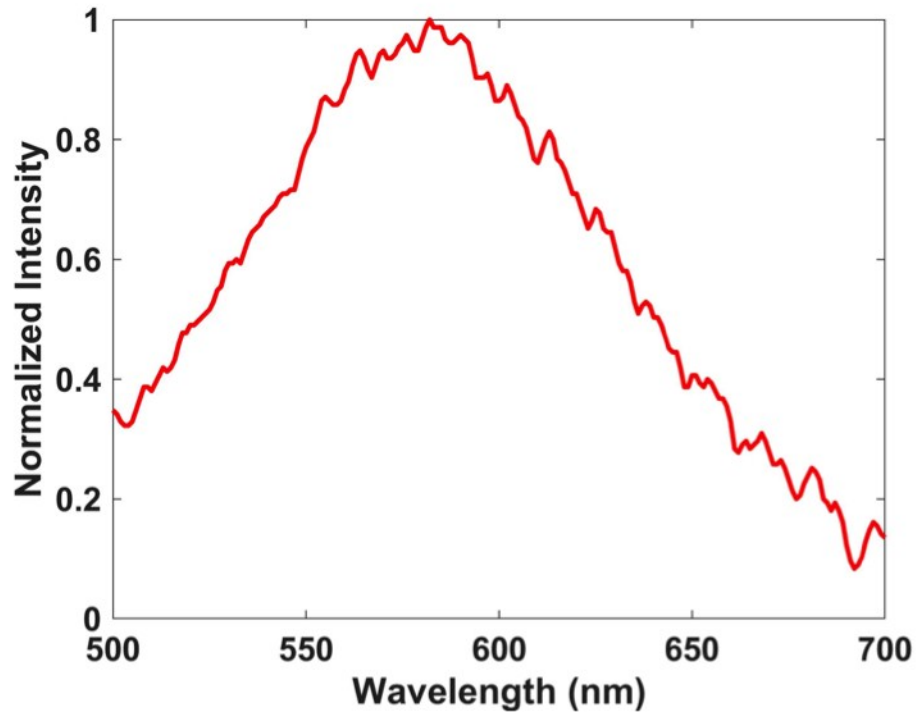

Supplementary figure 3. UV-Vis absorption spectrum of stock GNP suspension used for these studies.

Supplementary video S1. GNP motion within the cell through the well-defined contrast provided in the RMS map.
